# Supplementary material
Source: publisher site journal article supplement (https://www.dovepress.com/article/377421)
Supplement: Supplementary file 1 [file get_supplementary_file.php]

| **Endoscopist assessment** | |
| --- | --- |
| Endoscopist’s difficulties of EGD | 🞎 Very easy  🞎 Easy  🞎 Moderate  🞎 Difficult  🞎 Very difficult |
| Endoscopist’s overall satisfaction | 🞎 Very satisfied  🞎 Somewhat satisfied  🞎 Neither satisfied nor dissatisfied  🞎 Somewhat dissatisfied  🞎 Very dissatisfied |

**Supplementary data**

| Patient number |  |  |  |
| --- | --- | --- | --- |

.

|  | Patient number |  |  |  |
| --- | --- | --- | --- | --- |

| **Patient assessment score** | |
| --- | --- |
| Patient nauseous score | 🞎 None  🞎 little  🞎 Intermediate  🞎 Extreme |
| Patient’s overall satisfaction | 🞎 Very satisfied  🞎 Somewhat satisfied  🞎 Neither satisfied nor dissatisfied  🞎 Somewhat dissatisfied  🞎 Very dissatisfied |
